# Supplementary material for: Design and synthesis of pyrrole–5-(2,6-dichlorobenzyl)sulfonylindolin-2-ones with C-3′ side chains as potent Met kinase inhibitors
Source: Royal Society of Chemistry journal article supplement (doi:10.1039/c4ra08720h), 2014-01-01
Supplement: c4ra08720h1.pdf [file c4ra08720h1.pdf]

*Supporting Information*

**Design and synthesis of pyrrole-5-(2,6-dichlorobenzyl)sulfonylindolin-2-ones with C-3' side chains as potent Met kinase inhibitors**

Chia-Wei Liu,<sup>a</sup> Chun-Liang Lai,<sup>a</sup> Yu-Hsiang Lin,<sup>a</sup> Li-Wei Teng,<sup>a</sup> Sheng-chuan Yang,<sup>a</sup> Win-Yin Wei,<sup>a</sup> Shu Fu Lin,<sup>a</sup> Ju-Ying Yang,<sup>a</sup> Hung-Jyun Huang,<sup>a</sup> Ru-Wen Wang,<sup>a</sup> Chao-Cheng Chiang,<sup>a</sup> Mei-Hui Lee,<sup>a</sup> Yu-Chuan Wang,<sup>b</sup> Shih-Hsien Chuang,<sup>a</sup> Jia-Ming Chang,<sup>a</sup> Ying-Shuan E. Lee,<sup>a</sup> and Jiann-Jyh Huang<sup>\*a,b</sup>

<sup>a</sup>*Development Center for Biotechnology, No. 101, Lane 169, Kangning St., Xizhi District, New Taipei City 22180, Taiwan*

<sup>b</sup>*Department of Applied Chemistry, National Chiayi University, No. 300, Syuefu Rd., Chiayi City 60004, Taiwan*

\*Corresponding Author. Tel.: +886 5 271 7959; Fax: +886 5 271 7901. E-mail address: lukehuang@mail.ncyu.edu.tw (J.-J. Huang)

| <u>Table of Contents:</u>                                                                                                   | <u>Page</u> |
|-----------------------------------------------------------------------------------------------------------------------------|-------------|
| <b>Supporting Figure.</b> Ligplot diagrams of the ATP binding site of Met complexed with compounds <b>2</b> and <b>20</b> . | S2          |
| <b>Supporting Table.</b> Kinase profiling data of compound <b>20</b> .                                                      | S3          |
| <b>References</b>                                                                                                           | S10         |

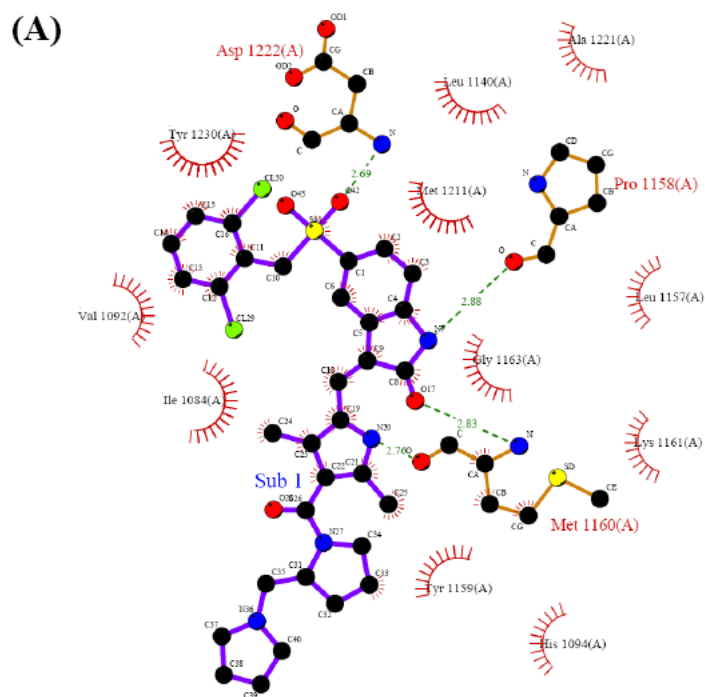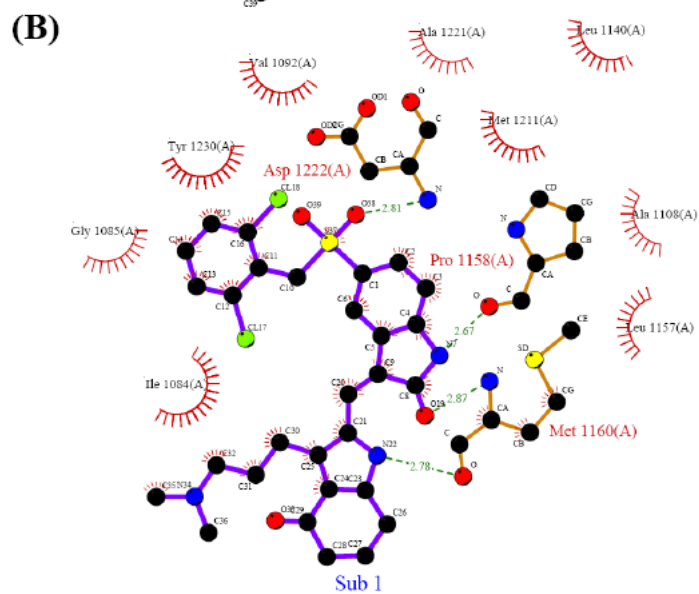

Key

- Ligand bond
- Non-ligand bond
- Hydrogen bond and its length
- His 53 Non-ligand residues involved in hydrophobic contact(s)
- Corresponding atoms involved in hydrophobic contact(s)

**Supporting Figure.** Ligplot diagrams<sup>1</sup> of the ATP binding site of Met complexed with compounds **2** and **20**: (A) Met with **2**, and (B) Met with **20**.

**Supporting Table. Kinase profiling data of 20.**

**Ambit KinomeScan Kinase Profiling (1.0  $\mu$ M test concentration):**

| Ambit Gene Symbol             | Percentage of control (%) |
|-------------------------------|---------------------------|
|                               | <b>20</b>                 |
| AAK1                          | 68                        |
| ABL1(E255K)-phosphorylated    | 85                        |
| ABL1(F317I)-nonphosphorylated | 78                        |
| ABL1(F317I)-phosphorylated    | 65                        |
| ABL1(F317L)-nonphosphorylated | 76                        |
| ABL1(F317L)-phosphorylated    | 100                       |
| ABL1(H396P)-nonphosphorylated | 65                        |
| ABL1(H396P)-phosphorylated    | 72                        |
| ABL1(M351T)-phosphorylated    | 83                        |
| ABL1(Q252H)-nonphosphorylated | 64                        |
| ABL1(Q252H)-phosphorylated    | 73                        |
| ABL1(T315I)-nonphosphorylated | 74                        |
| ABL1(T315I)-phosphorylated    | 95                        |
| ABL1(Y253F)-phosphorylated    | 75                        |
| ABL1-nonphosphorylated        | 73                        |
| ABL1-phosphorylated           | 75                        |
| ABL2                          | 78                        |
| ACVR1                         | 100                       |
| ACVR1B                        | 74                        |
| ACVR2A                        | 95                        |
| ACVR2B                        | 79                        |
| ACVRL1                        | 100                       |
| ADCK3                         | 81                        |
| ADCK4                         | 86                        |
| AKT1                          | 100                       |
| AKT2                          | 100                       |
| AKT3                          | 100                       |
| ALK                           | 70                        |
| AMPK-alpha1                   | 11                        |
| AMPK-alpha2                   | 34                        |
| ANKK1                         | 60                        |

| Ambit Gene Symbol | Percentage of control (%) |
|-------------------|---------------------------|
|                   | <b>20</b>                 |
| ARK5              | 27                        |
| ASK1              | 100                       |
| ASK2              | 67                        |
| AURKA             | 49                        |
| AURKB             | 74                        |
| AURKC             | 24                        |
| AXL               | 27                        |
| BIKE              | 53                        |
| BLK               | 72                        |
| BMPR1A            | 76                        |
| BMPR1B            | 64                        |
| BMPR2             | 85                        |
| BMX               | 81                        |
| BRAF              | 89                        |
| BRAF(V600E)       | 98                        |
| BRK               | 87                        |
| BRSK1             | 65                        |
| BRSK2             | 72                        |
| BTK               | 100                       |
| BUB1              | 64                        |
| CAMK1             | 50                        |
| CAMK1D            | 67                        |
| CAMK1G            | 64                        |
| CAMK2A            | 91                        |
| CAMK2B            | 79                        |
| CAMK2D            | 87                        |
| CAMK2G            | 86                        |
| CAMK4             | 100                       |
| CAMKK1            | 7.2                       |
| CAMKK2            | 15                        |
| CASK              | 63                        |

| Ambit Gene Symbol   | Percentage of control (%) |
|---------------------|---------------------------|
|                     | 20                        |
| CDC2L1              | 100                       |
| CDC2L2              | 95                        |
| CDC2L5              | 71                        |
| CDK11               | 84                        |
| CDK2                | 73                        |
| CDK3                | 95                        |
| CDK4-cyclinD1       | 42                        |
| CDK4-cyclinD3       | 46                        |
| CDK5                | 75                        |
| CDK7                | 11                        |
| CDK8                | 87                        |
| CDK9                | 55                        |
| CDKL1               | 68                        |
| CDKL2               | 9.7                       |
| CDKL3               | 78                        |
| CDKL5               | 96                        |
| CHEK1               | 100                       |
| CHEK2               | 100                       |
| CIT                 | 100                       |
| CLK1                | 49                        |
| CLK2                | 32                        |
| CLK3                | 67                        |
| CLK4                | 79                        |
| CSF1R               | 6.8                       |
| CSF1R-autoinhibited | 71                        |
| CSK                 | 79                        |
| CSNK1A1             | 51                        |
| CSNK1A1L            | 83                        |
| CSNK1D              | 32                        |
| CSNK1E              | 16                        |
| CSNK1G1             | 89                        |
| CSNK1G2             | 88                        |
| CSNK1G3             | 66                        |
| CSNK2A1             | 41                        |
| CSNK2A2             | 25                        |

| Ambit Gene Symbol         | Percentage of control (%) |
|---------------------------|---------------------------|
|                           | 20                        |
| CTK                       | 50                        |
| DAPK1                     | 58                        |
| DAPK2                     | 86                        |
| DAPK3                     | 36                        |
| DCAMKL1                   | 32                        |
| DCAMKL2                   | 18                        |
| DCAMKL3                   | 9.8                       |
| DDR1                      | 17                        |
| DDR2                      | 30                        |
| DLK                       | 67                        |
| DMPK                      | 100                       |
| DMPK2                     | 71                        |
| DRAK1                     | 100                       |
| DRAK2                     | 54                        |
| DYRK1A                    | 100                       |
| DYRK1B                    | 67                        |
| DYRK2                     | 62                        |
| EGFR                      | 100                       |
| EGFR(E746-A750del)        | 100                       |
| EGFR(G719C)               | 64                        |
| EGFR(G719S)               | 67                        |
| EGFR(L747-E749del, A750P) | 100                       |
| EGFR(L747-S752del, P753S) | 100                       |
| EGFR(L747-T751del,Sins)   | 67                        |
| EGFR(L858R)               | 94                        |
| EGFR(L858R,T790M)         | 83                        |
| EGFR(L861Q)               | 57                        |
| EGFR(S752-I759del)        | 70                        |
| EGFR(T790M)               | 57                        |
| EIF2AK1                   | 85                        |
| EPHA1                     | 82                        |
| EPHA2                     | 90                        |
| EPHA3                     | 67                        |
| EPHA4                     | 82                        |
| EPHA5                     | 76                        |

| Ambit Gene Symbol | Percentage of control (%) |
|-------------------|---------------------------|
|                   | 20                        |
| EPHA6             | 83                        |
| EPHA7             | 70                        |
| EPHA8             | 66                        |
| EPHB1             | 79                        |
| EPHB2             | 96                        |
| EPHB3             | 97                        |
| EPHB4             | 100                       |
| EPHB6             | 91                        |
| ERBB2             | 73                        |
| ERBB3             | 86                        |
| ERBB4             | 78                        |
| ERK1              | 85                        |
| ERK2              | 80                        |
| ERK3              | 90                        |
| ERK4              | 100                       |
| ERK5              | 50                        |
| ERK8              | 38                        |
| ERN1              | 57                        |
| FAK               | 58                        |
| FER               | 100                       |
| FES               | 100                       |
| FGFR1             | 87                        |
| FGFR2             | 89                        |
| FGFR3             | 86                        |
| FGFR3(G697C)      | 64                        |
| FGFR4             | 83                        |
| FGR               | 63                        |
| FLT1              | 100                       |
| FLT3              | 40                        |
| FLT3(D835H)       | 18                        |
| FLT3(D835Y)       | 9.8                       |
| FLT3(ITD)         | 9                         |
| FLT3(K663Q)       | 29                        |
| FLT3(N841I)       | 15                        |
| FLT3(R834Q)       | 54                        |

| Ambit Gene Symbol            | Percentage of control (%) |
|------------------------------|---------------------------|
|                              | 20                        |
| FLT3-autoinhibited           | 86                        |
| FLT4                         | 100                       |
| FRK                          | 96                        |
| FYN                          | 78                        |
| GAK                          | 74                        |
| GCN2(Kin.Dom.2,S808G)        | 76                        |
| GRK1                         | 2                         |
| GRK4                         | 71                        |
| GRK7                         | 3                         |
| GSK3A                        | 81                        |
| GSK3B                        | 70                        |
| HASPIN                       | 87                        |
| HCK                          | 88                        |
| HIPK1                        | 60                        |
| HIPK2                        | 37                        |
| HIPK3                        | 41                        |
| HIPK4                        | 74                        |
| HPK1                         | 30                        |
| HUNK                         | 50                        |
| ICK                          | 49                        |
| IGF1R                        | 87                        |
| IKK-alpha                    | 70                        |
| IKK-beta                     | 85                        |
| IKK-epsilon                  | 65                        |
| INSR                         | 56                        |
| INSRR                        | 100                       |
| IRAK1                        | 13                        |
| IRAK3                        | 45                        |
| IRAK4                        | 4.2                       |
| ITK                          | 81                        |
| JAK1(JH1domain-catalytic)    | 69                        |
| JAK1(JH2domain-pseudokinase) | 82                        |
| JAK2(JH1domain-catalytic)    | 3.6                       |
| JAK3(JH1domain-catalytic)    | 12                        |
| JNK1                         | 100                       |

| Ambit Gene Symbol | Percentage of control (%) |
|-------------------|---------------------------|
|                   | 20                        |
| JNK2              | 100                       |
| JNK3              | 100                       |
| KIT               | 47                        |
| KIT(A829P)        | 45                        |
| KIT(D816H)        | 64                        |
| KIT(D816V)        | 49                        |
| KIT(L576P)        | 20                        |
| KIT(V559D)        | 45                        |
| KIT(V559D,T670I)  | 54                        |
| KIT(V559D,V654A)  | 53                        |
| KIT-autoinhibited | 100                       |
| LATS1             | 84                        |
| LATS2             | 83                        |
| LCK               | 46                        |
| LIMK1             | 94                        |
| LIMK2             | 100                       |
| LKB1              | 100                       |
| LOK               | 32                        |
| LRRK2             | 55                        |
| LRRK2(G2019S)     | 70                        |
| LTK               | 100                       |
| LYN               | 65                        |
| LZK               | 68                        |
| MAK               | 43                        |
| MAP3K1            | 73                        |
| MAP3K15           | 47                        |
| MAP3K2            | 74                        |
| MAP3K3            | 61                        |
| MAP3K4            | 45                        |
| MAP4K2            | 1.8                       |
| MAP4K3            | 1.2                       |
| MAP4K4            | 3.7                       |
| MAP4K5            | 0.45                      |
| MAPKAPK2          | 100                       |
| MAPKAPK5          | 88                        |

| Ambit Gene Symbol | Percentage of control (%) |
|-------------------|---------------------------|
|                   | 20                        |
| MARK1             | 72                        |
| MARK2             | 55                        |
| MARK3             | 51                        |
| MARK4             | 100                       |
| MAST1             | 72                        |
| MEK1              | 58                        |
| MEK2              | 29                        |
| MEK3              | 93                        |
| MEK4              | 97                        |
| MEK5              | 16                        |
| MEK6              | 58                        |
| MELK              | 73                        |
| MERTK             | 33                        |
| MET               | 3.2                       |
| MET(M1250T)       | 5.7                       |
| MET(Y1235D)       | 1.2                       |
| MINK              | 11                        |
| MKK7              | 63                        |
| MKNK1             | 100                       |
| MKNK2             | 88                        |
| MLCK              | 100                       |
| MLK1              | 94                        |
| MLK2              | 90                        |
| MLK3              | 100                       |
| MRCKA             | 83                        |
| MRCKB             | 98                        |
| MST1              | 60                        |
| MST1R             | 62                        |
| MST2              | 3.5                       |
| MST3              | 57                        |
| MST4              | 78                        |
| MTOR              | 99                        |
| MUSK              | 96                        |
| MYLK              | 80                        |
| MYLK2             | 37                        |

| Ambit Gene Symbol     | Percentage of control (%) |
|-----------------------|---------------------------|
|                       | 20                        |
| MYLK4                 | 71                        |
| MYO3A                 | 85                        |
| MYO3B                 | 89                        |
| NDR1                  | 70                        |
| NDR2                  | 84                        |
| NEK1                  | 36                        |
| NEK11                 | 56                        |
| NEK2                  | 25                        |
| NEK3                  | 91                        |
| NEK4                  | 58                        |
| NEK5                  | 62                        |
| NEK6                  | 83                        |
| NEK7                  | 77                        |
| NEK9                  | 88                        |
| NIM1                  | 71                        |
| NLK                   | 86                        |
| OSR1                  | 55                        |
| p38-alpha             | 64                        |
| p38-beta              | 87                        |
| p38-delta             | 89                        |
| p38-gamma             | 74                        |
| PAK1                  | 78                        |
| PAK2                  | 71                        |
| PAK3                  | 34                        |
| PAK4                  | 100                       |
| PAK6                  | 75                        |
| PAK7                  | 78                        |
| PCTK1                 | 100                       |
| PCTK2                 | 89                        |
| PCTK3                 | 99                        |
| PDGFRA                | 76                        |
| PDGFRB                | 2.7                       |
| PDPK1                 | 100                       |
| PFCDPK1(P.falciparum) | 67                        |
| PFPK5(P.falciparum)   | 82                        |

| Ambit Gene Symbol    | Percentage of control (%) |
|----------------------|---------------------------|
|                      | 20                        |
| PFTAIRE2             | 65                        |
| PFTK1                | 92                        |
| PHKG1                | 66                        |
| PHKG2                | 50                        |
| PIK3C2B              | 67                        |
| PIK3C2G              | 100                       |
| PIK3CA               | 96                        |
| PIK3CA(C420R)        | 74                        |
| PIK3CA(E542K)        | 59                        |
| PIK3CA(E545A)        | 72                        |
| PIK3CA(E545K)        | 42                        |
| PIK3CA(H1047L)       | 89                        |
| PIK3CA(H1047Y)       | 100                       |
| PIK3CA(I800L)        | 100                       |
| PIK3CA(M1043I)       | 100                       |
| PIK3CA(Q546K)        | 100                       |
| PIK3CB               | 84                        |
| PIK3CD               | 100                       |
| PIK3CG               | 99                        |
| PIK4CB               | 88                        |
| PIM1                 | 74                        |
| PIM2                 | 100                       |
| PIM3                 | 97                        |
| PIP5K1A              | 51                        |
| PIP5K1C              | 83                        |
| PIP5K2B              | 62                        |
| PIP5K2C              | 66                        |
| PKAC-alpha           | 100                       |
| PKAC-beta            | 100                       |
| PKMYT1               | 100                       |
| PKN1                 | 64                        |
| PKN2                 | 58                        |
| PKNB(M.tuberculosis) | 84                        |
| PLK1                 | 100                       |
| PLK2                 | 77                        |

| Ambit Gene Symbol             | Percentage of control (%) |
|-------------------------------|---------------------------|
|                               | 20                        |
| PLK3                          | 76                        |
| PLK4                          | 41                        |
| PRKCD                         | 93                        |
| PRKCE                         | 60                        |
| PRKCH                         | 100                       |
| PRKCI                         | 70                        |
| PRKCQ                         | 61                        |
| PRKD1                         | 78                        |
| PRKD2                         | 81                        |
| PRKD3                         | 100                       |
| PRKG1                         | 100                       |
| PRKG2                         | 98                        |
| PRKR                          | 72                        |
| PRKX                          | 80                        |
| PRP4                          | 79                        |
| PYK2                          | 49                        |
| QSK                           | 73                        |
| RAF1                          | 100                       |
| RET                           | 70                        |
| RET(M918T)                    | 54                        |
| RET(V804L)                    | 49                        |
| RET(V804M)                    | 55                        |
| RIOK1                         | 43                        |
| RIOK2                         | 70                        |
| RIOK3                         | 39                        |
| RIPK1                         | 100                       |
| RIPK2                         | 90                        |
| RIPK4                         | 97                        |
| RIPK5                         | 76                        |
| ROCK1                         | 48                        |
| ROCK2                         | 54                        |
| ROS1                          | 36                        |
| RPS6KA4(Kin.Dom.1-N-terminal) | 100                       |
| RPS6KA4(Kin.Dom.2-C-terminal) | 87                        |
| RPS6KA5(Kin.Dom.1-N-terminal) | 100                       |

| Ambit Gene Symbol             | Percentage of control (%) |
|-------------------------------|---------------------------|
|                               | 20                        |
| RPS6KA5(Kin.Dom.2-C-terminal) | 53                        |
| RSK1(Kin.Dom.1-N-terminal)    | 53                        |
| RSK1(Kin.Dom.2-C-terminal)    | 62                        |
| RSK2(Kin.Dom.1-N-terminal)    | 51                        |
| RSK2(Kin.Dom.2-C-terminal)    | 100                       |
| RSK3(Kin.Dom.1-N-terminal)    | 3.6                       |
| RSK3(Kin.Dom.2-C-terminal)    | 73                        |
| RSK4(Kin.Dom.1-N-terminal)    | 55                        |
| RSK4(Kin.Dom.2-C-terminal)    | 75                        |
| S6K1                          | 25                        |
| SBK1                          | 74                        |
| SGK                           | 42                        |
| SgK110                        | 44                        |
| SGK3                          | 50                        |
| SIK                           | 71                        |
| SIK2                          | 62                        |
| SLK                           | 40                        |
| SNARK                         | 12                        |
| SNRK                          | 80                        |
| SRC                           | 98                        |
| SRMS                          | 55                        |
| SRPK1                         | 55                        |
| SRPK2                         | 76                        |
| SRPK3                         | 67                        |
| STK16                         | 64                        |
| STK33                         | 12                        |
| STK35                         | 73                        |
| STK36                         | 94                        |
| STK39                         | 87                        |
| SYK                           | 100                       |
| TAK1                          | 79                        |
| TAOK1                         | 4.2                       |
| TAOK2                         | 4.8                       |
| TAOK3                         | 0.45                      |
| TBK1                          | 44                        |





|  |  |
|--|--|
|  |  |
|  |  |

|  |  |
|--|--|
|  |  |
|--|--|

## References

- 1 A. C. Wallace, R. A. Laskowski, J. M. Thornton, *Protein Eng.*, 1995, **8**, 127–134.
